# Supplementary material
Source: ML conference proceedings conference paper supplement (https://openaccess.thecvf.com/content/CVPR2024/html/Wu_TeTriRF_Temporal_Tri-Plane_CVPR_2024_paper.html)
Supplement: Supplementary file 1 [file Wu_TeTriRF_Temporal_Tri-Plane_CVPR_2024_supplemental.pdf]

# TeTriRF: Temporal Tri-Plane Radiance Fields for Efficient Free-Viewpoint Video

## Supplementary Material

### 1. Implementation Details

**Model Configuration.** In our setup, all frames within a sequence utilize a common bounding box that defines their world space. These bounding boxes are derived based on the camera configurations. For object-centric datasets (NHR and ReRF), the world size is set to  $120^3$ , while for the DyNeRF dataset, it is  $210^3$ . We determine the feature plane resolution as three times the world size. Specifically, this results in approximately  $360 \times 360$  for the NHR and ReRF datasets and  $600 \times 600$  for the DyNeRF dataset, aiming to capture high-frequency signals effectively. Each feature plane comprises  $h = 10$  channels, leading to a concatenated feature vector for each 3D point with a dimensionality of 30. The viewing directions undergo positional encoding with 4 frequency levels. We combine these encoded viewing directions with point feature vectors to serve as inputs for the MLP decoder  $\Phi$ . The decoder  $\Phi$  is a three-layer multilayer perceptron, having a width of 128. It outputs the RGB value for the sampled point. A unique MLP decoder is allocated to each frame group, facilitating shared learning across the frames in a group.

**Training.** For training, we employ the Adam optimizer [4] to update the density grids, tri-planes, and MLP decoder weights. The respective learning rates for these components are set to  $1.5e^{-1}$  for the density grids and tri-planes, and  $1e^{-3}$  for the MLP decoder. We implement group-based regularization with weights  $\lambda_1 = 1e^{-3}$  and  $\lambda_2 = 2e^{-3}$ . Each training batch processes 17800 sampled rays from the dataset, and we conduct 40000 training iterations for each group. In our progressive scaling approach, the hybrid representation is upsampled by a factor of two at specific iterations: [1000, 2000, 3000, 4000] during the first pass, and [9000, 11000, 13000] during the second. We downscale the resolutions at the first and 7000-th iterations. Full resolutions are achieved at the 4000-th and 13000-th iterations. Every 1000 iterations, we update the occupancy grids  $V_o$  based on the density grids  $V_\sigma$ , formulated as

$$V_o = \rho(\kappa(1 - \frac{1}{1 + \exp(V_\sigma)}), \lambda_{th}). \quad (1)$$

Here,  $\kappa(\cdot)$  represents a 3D max pooling function with a  $3 \times 3$  kernel, and  $\rho(\cdot)$  is a thresholding function that outputs 1 if the grid element is greater than  $\lambda_{th} = 1e^{-4}$ , otherwise 0, indicating occupancy. At the 13000-th iteration, we filter out rays that do not intersect with any objects according to the current occupancy grid.

|            |            | PSNR  | SSIM  | LPIPS  | Size (KB) |
|------------|------------|-------|-------|--------|-----------|
| sport1     | K-plane    | 30.40 | 0.962 | 0.0615 | 2986      |
|            | HumanRF    | 32.39 | 0.885 | 0.0318 | 2852      |
|            | TiNeuVox   | 30.54 | 0.961 | 0.0831 | 5580      |
|            | ReRF       | 30.83 | 0.973 | 0.0505 | 1113      |
|            | Ours(low)  | 31.79 | 0.969 | 0.0516 | 11.01     |
|            | Ours(high) | 33.41 | 0.980 | 0.0389 | 79.92     |
| sport2     | K-plane    | 32.10 | 0.975 | 0.0472 | 2986      |
|            | HumanRF    | 33.04 | 0.889 | 0.0316 | 2852      |
|            | TiNeuVox   | 32.97 | 0.972 | 0.0568 | 5580      |
|            | ReRF       | 31.83 | 0.976 | 0.0487 | 1316      |
|            | Ours(low)  | 31.75 | 0.973 | 0.0498 | 10.56     |
|            | Ours(high) | 34.14 | 0.983 | 0.0383 | 75.85     |
| sport3     | K-plane    | 30.20 | 0.962 | 0.0610 | 2986      |
|            | HumanRF    | 32.11 | 0.885 | 0.0328 | 2852      |
|            | TiNeuVox   | 30.11 | 0.960 | 0.0696 | 5580      |
|            | ReRF       | 30.89 | 0.976 | 0.0473 | 1243      |
|            | Ours(low)  | 30.38 | 0.967 | 0.0546 | 12.96     |
|            | Ours(high) | 32.90 | 0.980 | 0.0394 | 94.58     |
| basketball | K-plane    | 28.02 | 0.957 | 0.0822 | 2986      |
|            | HumanRF    | 30.09 | 0.829 | 0.0469 | 2852      |
|            | TiNeuVox   | 28.18 | 0.956 | 0.0991 | 5580      |
|            | ReRF       | 27.82 | 0.963 | 0.0747 | 1208      |
|            | Ours(low)  | 27.79 | 0.957 | 0.0806 | 12.53     |
|            | Ours(high) | 29.85 | 0.970 | 0.0649 | 90.97     |

Table 1. Per-scene results on NHR dataset [11]. Values are averaged out over the number of frames in each scene.

### 2. Comparison Setups

We compared TeTriRF with several contemporary dynamic NeRF techniques, including KPlanes [2], HumanRF [3], TiNeuVox [1], and ReRF [10]. For forward-facing scenes, TeTriRF was additionally compared with NeRFPlayer [6].

**KPlanes.** We use the official implementation from NeRFStudio [7]. The KPlanes model was jointly trained on the entire sequence for 50,000 iterations, using a grid size of  $256^3$  and a time resolution of 100, as recommended.

**HumanRF.** We employed their official code for our experiments. Two hundred frames were trained jointly over 50,000 iterations. Initially, occupancy grids were generated using foreground masks as outlined in [3], followed by their prescribed training steps.

**TiNeuVox.** We use their official code. Due to memory constraints, each sequence was split into eight groups of 25 frames each. We used a grid size of  $180^3$  and trained each

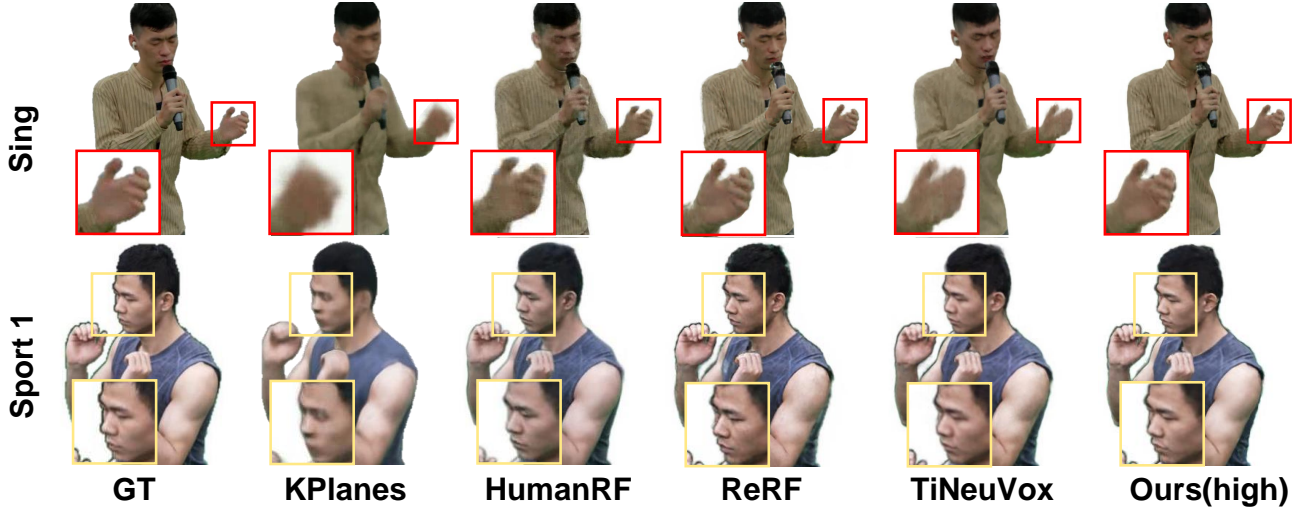

Figure 1. Extra qualitative results on ‘Sing’ from ReRF dataset [10] and ‘Sport1’ from NHR dataset [11].

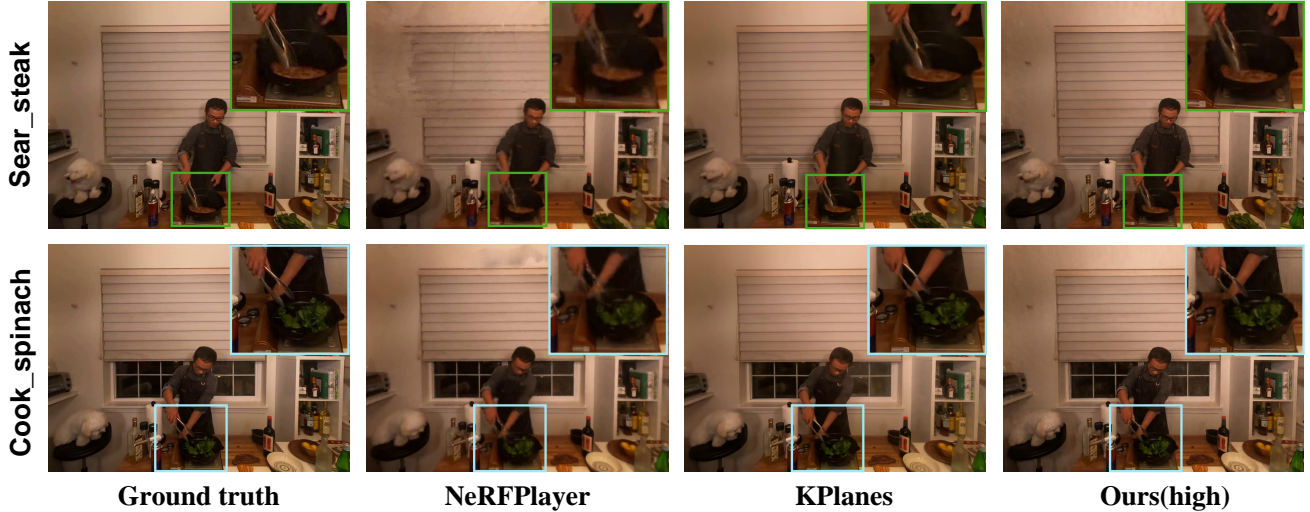

Figure 2. Extra qualitative results on DyNeRF dataset [5].

group for 30,000 iterations.

**ReRF.** The official code and default settings were used in our experiments, compressing sequences with a quality factor of 99.

**NeRFPlayer.** We relied on the quantitative results reported in the original paper [6] and conducted qualitative analyses using the official NeRFStudio implementation based on Nerfacto under default settings.

**MixVoxels.** We conducted tests using its official pre-trained model, MixVoxels-M [8], under identical experimental settings and present only the averaged results.

**Ours.** Following the configurations detailed in our implementation section, we leverage the FFMPEG software with the libx265 codec for compressing the feature and density image sequences.

### 3. More Results

Table 1, Table 2, and Table 3 provide the detailed results for each scene. Figure 1 and Figure 2 demonstrate the qualitative comparison on three datasets.

### 4. Video

Please refer to our project page(<https://wuminye.github.io/projects/TeTriRF/>) for more qualitative results and comparisons. We use ‘Ours(high)’ in our video.

### References

- [1] Jiemin Fang, Taoran Yi, Xinggang Wang, Lingxi Xie, Xiaopeng Zhang, Wenyu Liu, Matthias Nießner, and Qi Tian.

|      |            | PSNR  | SSIM  | LPIPS  | Size (KB) |
|------|------------|-------|-------|--------|-----------|
| box  | K-plane    | 27.96 | 0.952 | 0.0836 | 2986      |
|      | HumanRF    | 29.07 | 0.884 | 0.0614 | 2852      |
|      | TiNeuVox   | 31.11 | 0.962 | 0.0633 | 5580      |
|      | ReRF       | 30.97 | 0.972 | 0.0516 | 925       |
|      | Ours(low)  | 27.94 | 0.955 | 0.0655 | 11.86     |
|      | Ours(high) | 31.39 | 0.968 | 0.0498 | 70.01     |
| kpop | K-plane    | 26.95 | 0.954 | 0.0984 | 2986      |
|      | HumanRF    | 28.84 | 0.901 | 0.0682 | 2852      |
|      | TiNeuVox   | 27.22 | 0.952 | 0.0887 | 5580      |
|      | ReRF       | 31.94 | 0.976 | 0.0436 | 725       |
|      | Ours(low)  | 27.03 | 0.964 | 0.0678 | 13.11     |
|      | Ours(high) | 30.25 | 0.977 | 0.0526 | 80.1      |
| sing | K-plane    | 28.52 | 0.931 | 0.1009 | 2986      |
|      | HumanRF    | 27.84 | 0.846 | 0.0874 | 2852      |
|      | TiNeuVox   | 28.28 | 0.929 | 0.0956 | 5580      |
|      | ReRF       | 28.11 | 0.937 | 0.0688 | 879       |
|      | Ours(low)  | 27.84 | 0.931 | 0.0818 | 10.19     |
|      | Ours(high) | 28.91 | 0.942 | 0.0669 | 64.92     |

Table 2. Per-scene results on ReRF dataset [9]. Values are averaged out over the number of frames in each scene.

Fast dynamic radiance fields with time-aware neural voxels. In *SIGGRAPH Asia 2022 Conference Papers*, 2022. 1

- [2] Sara Fridovich-Keil, Giacomo Meanti, Frederik Rahbæk Warburg, Benjamin Recht, and Angjoo Kanazawa. K-planes: Explicit radiance fields in space, time, and appearance. In *Proceedings of the IEEE/CVF Conference on Computer Vision and Pattern Recognition*, pages 12479–12488, 2023. 1
- [3] Mustafa Işık, Martin Rünz, Markos Georgopoulos, Taras Khakhulin, Jonathan Starck, Lourdes Agapito, and Matthias Nießner. Humanrf: High-fidelity neural radiance fields for humans in motion. *ACM Transactions on Graphics (TOG)*, 42(4):1–12, 2023. 1
- [4] Diederik P Kingma and Jimmy Ba. Adam: A method for stochastic optimization. *arXiv preprint arXiv:1412.6980*, 2014. 1
- [5] Tianye Li, Miroslava Slavcheva, Michael Zollhoefer, Simon Green, Christoph Lassner, Changil Kim, Tanner Schmidt, S. Lovegrove, Michael Goesele, Richard A. Newcombe, and Zhaoyang Lv. Neural 3d video synthesis from multi-view video. *2022 IEEE/CVF Conference on Computer Vision and Pattern Recognition (CVPR)*, pages 5511–5521, 2021. 2, 3
- [6] Liangchen Song, Anpei Chen, Zhong Li, Zhang Chen, Lele Chen, Junsong Yuan, Yi Xu, and Andreas Geiger. Nerf-player: A streamable dynamic scene representation with decomposed neural radiance fields. *IEEE Transactions on Visualization and Computer Graphics*, 29(5):2732–2742, 2023. 1, 2
- [7] Matthew Tancik, Ethan Weber, Evonne Ng, Ruilong Li, Brent Yi, Terrance Wang, Alexander Kristoffersen, Jake Austin, Kamyar Salahi, Abhik Ahuja, et al. Nerfstudio: A modular framework for neural radiance field development.

|                  |            | PSNR  | SSIM  | LPIPS  | Size (KB) |
|------------------|------------|-------|-------|--------|-----------|
| flame samon      | K-plane    | 30.57 | 0.925 | 0.2105 | 539       |
|                  | NeRFPlayer | 26.14 | 0.849 | 0.3790 | 2427      |
|                  | Ours(low)  | 26.69 | 0.830 | 0.3486 | 26.70     |
|                  | Ours(high) | 28.05 | 0.872 | 0.2727 | 73.78     |
| flame steak      | K-plane    | 32.88 | 0.957 | 0.2021 | 539       |
|                  | NeRFPlayer | 27.36 | 0.867 | 0.3550 | 2427      |
|                  | Ours(low)  | 30.11 | 0.891 | 0.3031 | 18.90     |
|                  | Ours(high) | 32.13 | 0.929 | 0.2295 | 56.12     |
| coffee martini   | K-plane    | 30.22 | 0.925 | 0.2113 | 539       |
|                  | NeRFPlayer | 32.05 | 0.938 | 0.2790 | 2427      |
|                  | Ours(low)  | 26.28 | 0.822 | 0.3626 | 26.80     |
|                  | Ours(high) | 27.26 | 0.865 | 0.2890 | 76.37     |
| cut roasted beef | K-plane    | 32.08 | 0.943 | 0.2196 | 539       |
|                  | NeRFPlayer | 31.83 | 0.928 | 0.2870 | 2427      |
|                  | Ours(low)  | 29.60 | 0.887 | 0.3035 | 18.54     |
|                  | Ours(high) | 31.57 | 0.923 | 0.2374 | 56.13     |
| cook spinach     | K-plane    | 30.87 | 0.938 | 0.2212 | 539       |
|                  | NeRFPlayer | 32.06 | 0.930 | 0.2840 | 2427      |
|                  | Ours(low)  | 29.40 | 0.882 | 0.3079 | 20.01     |
|                  | Ours(high) | 31.41 | 0.919 | 0.2398 | 60.00     |
| sear steak       | K-plane    | 31.69 | 0.955 | 0.2057 | 539       |
|                  | NeRFPlayer | 32.31 | 0.940 | 0.2720 | 2427      |
|                  | Ours(low)  | 30.19 | 0.892 | 0.2994 | 17.81     |
|                  | Ours(high) | 32.18 | 0.931 | 0.2245 | 52.60     |

Table 3. Per-scene results on DyNeRF dataset [5]. Values are averaged out over the number of frames in each scene.

In *ACM SIGGRAPH 2023 Conference Proceedings*, pages 1–12, 2023. 1

- [8] Feng Wang, Sinan Tan, Xinghang Li, Zeyue Tian, Yafei Song, and Huaping Liu. Mixed neural voxels for fast multi-view video synthesis. In *Proceedings of the IEEE/CVF International Conference on Computer Vision*, pages 19706–19716, 2023. 2
- [9] Liao Wang, Qiang Hu, Qihan He, Ziyu Wang, Jingyi Yu, Tinne Tuytelaars, Lan Xu, and Minye Wu. Neural residual radiance fields for streamably free-viewpoint videos. In *Proceedings of the IEEE/CVF Conference on Computer Vision and Pattern Recognition*, pages 76–87, 2023. 3
- [10] L. Wang, Q. Hu, Q. He, Z. Wang, J. Yu, T. Tuytelaars, L. Xu, and M. Wu. Neural residual radiance fields for streamably free-viewpoint videos. In *2023 IEEE/CVF Conference on Computer Vision and Pattern Recognition (CVPR)*, pages 76–87, Los Alamitos, CA, USA, 2023. IEEE Computer Society. 1, 2
- [11] Minye Wu, Yuehao Wang, Qiang Hu, and Jingyi Yu. Multi-view neural human rendering. In *Proceedings of the IEEE/CVF Conference on Computer Vision and Pattern Recognition*, pages 1682–1691, 2020. 1, 2
